# Supplementary material
Source: publisher figshare collection journal article supplement (https://karger.figshare.com/articles/dataset/_/4781002)
Supplement: Supplementary file 1 [file 1]

## Supplementary material

**Table 1.** Primers used in this study

| Primer | Sequence                            | Amplicon size (bp) |
|--------|-------------------------------------|--------------------|
| MobCF  | 5'-GGTGGGATATATGAGCGAAC-3'          | 350                |
| MobCR  | 5'-CGCTGATATTACGTTCTAATGC-3'        |                    |
| MobAF  | 5'-GCGCAACCAAATCAACCTCA-3'          | 390                |
| MobAR  | 5'-GTCATGATTACGACAAACTTGG-3'        |                    |
| MobBF  | 5'-CGGTTTATCAGCGCGATGAA-3'          | 390                |
| MobBR  | 5'- GCGCCATGCTGAATGACC-3'           |                    |
| GyrF   | 5'-GCGTGAATCATTTTTAGATTATGCG-3'     | 447                |
| GyrR   | 5'-AAGTTAGGGAATCGAGCAG-3'           |                    |
| OriT9F | 5'-AGCTAAATCGGCTGCGTC-3'            | 319                |
| OriT9R | 5'-TATGAATTTGCCCATTAACCG-3'         |                    |
| MobDF2 | 5'-ATCTGCAGGTGAGTTACGTGAAAGGCTGG-3' | 251                |
| MobDR2 | 5'-CGGAATTCGCGCTTAGTTTAGTGGTTGCC-3' |                    |

Restriction sites are underlined: MobDF2, *Pst*I; MobDR2, *Eco*RI.

## Supplementary Material

**Table 2.** Strategies employed to construct some strains used in this study

| Transduction                      |                           | Intermediate strain           | Conjugation   |                               | Resultant strain                          |
|-----------------------------------|---------------------------|-------------------------------|---------------|-------------------------------|-------------------------------------------|
| Phage 80 $\alpha$ propagated into | Transduced strain         |                               | Donor         | Recipient                     |                                           |
| --                                | --                        | --                            | RN7242 (pGO1) | MB49 (pRJ14, pRJ6)            | MB367 (pGO1, pRJ14, pRJ6)                 |
| MB490 (pTmobD <sub>6</sub> )      | MB126 (pGO1, pRJ14)       | --                            | --            | --                            | MB491 (pGO1, pRJ14, pTmobD <sub>6</sub> ) |
| MB439 (pCNoriT <sub>9</sub> )     | A70 (pRJ6)                | (pCNoriT <sub>9</sub> , pRJ6) | RN7242 (pGO1) | (pCNoriT <sub>9</sub> , pRJ6) | MB464 (pGO1, pRJ6, pCNoriT <sub>9</sub> ) |
| MB387 (pCN37)                     | A70 (pRJ6)                | (pCN37, pRJ6)                 | RN7242 (pGO1) | (pCN37, pRJ6)                 | MB465 (pGO1, pRJ6, pCN37)                 |
| MB439 (pCNoriT <sub>9</sub> )     | MB180 (A70 cured of pRJ6) | (pCNoriT <sub>9</sub> )       | RN7242 (pGO1) | (pCNoriT <sub>9</sub> )       | MB476 (pGO1, pCNoriT <sub>9</sub> )       |
